# Supplementary material for: A selective fluorescent probe based on bis-Schiff base for “turn-on” detection of Al3+and cysteine by different mechanisms
Source: Royal Society of Chemistry journal article supplement (doi:10.1039/c6ra02030e), 2016-01-01
Supplement: c6ra02030e1.pdf [file c6ra02030e1.pdf]

## Supplementary Material

### **A selective fluorescent probe based on bis-Schiff base for “turn-on” detection of Al<sup>3+</sup> and cysteine on different mechanisms**

Yang Li <sup>a</sup>, Caiyun Liao <sup>a</sup>, Shanshan Huang <sup>a</sup>, Hui Xu <sup>a</sup>, Baozhan Zheng <sup>a</sup>, Juan Du <sup>a\*</sup>,  
and Dan Xiao <sup>a,b\*</sup>

*a College of Chemistry, Sichuan University, 29 Wangjiang Road, Chengdu 610064,*

*PR China*

*b College of Chemical Engineering, Sichuan University, 29 Wangjiang Road,*

*Chengdu 610065, PR China*

*E-mail: [xiaodan@scu.edu.cn](mailto:xiaodan@scu.edu.cn);*

*E-mail: [lxdj@vip.sina.com](mailto:lxdj@vip.sina.com)*

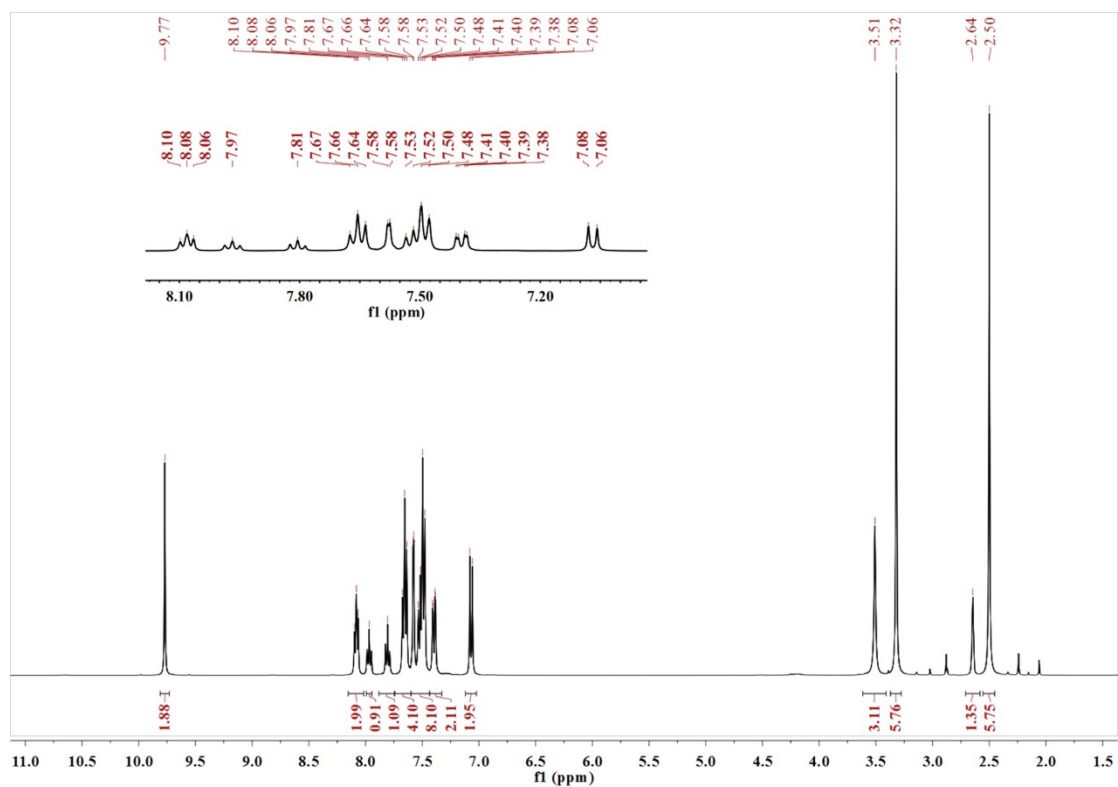

Fig. S1.  $^1\text{H}$ -NMR spectrum of compound L in  $\text{DMSO-d}_6$

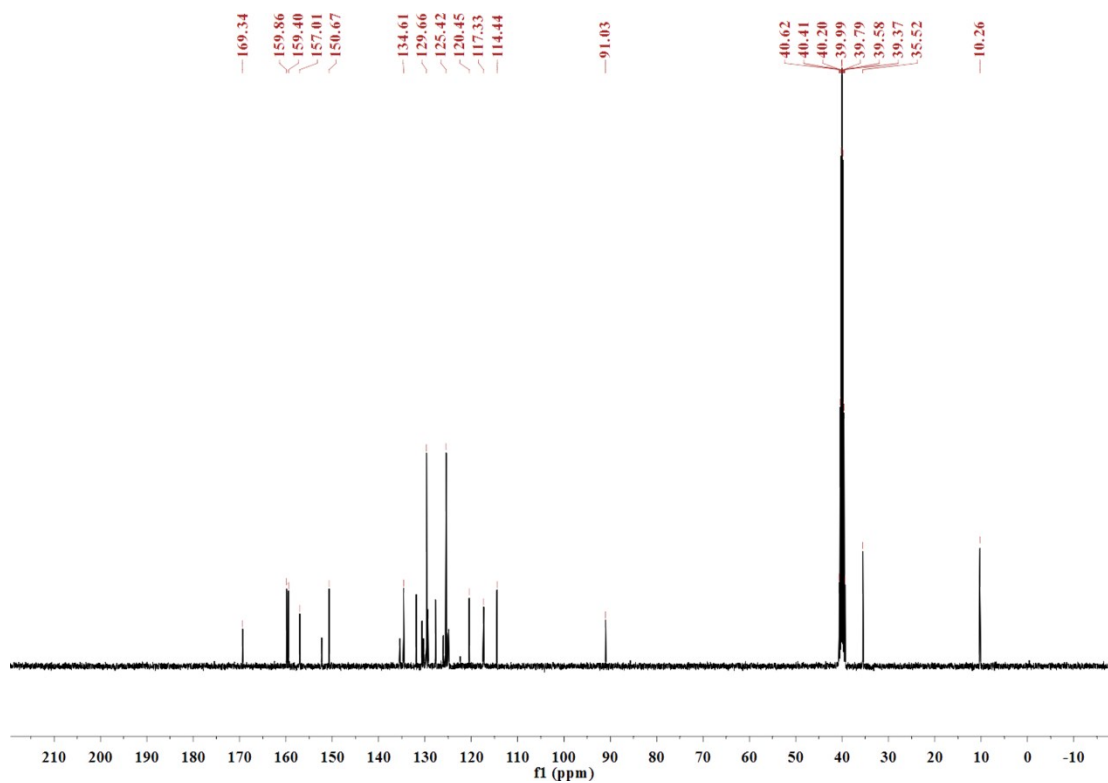

Fig. S2.  $^{13}\text{C}$ -NMR spectrum of compound L in  $\text{DMSO-d}_6$

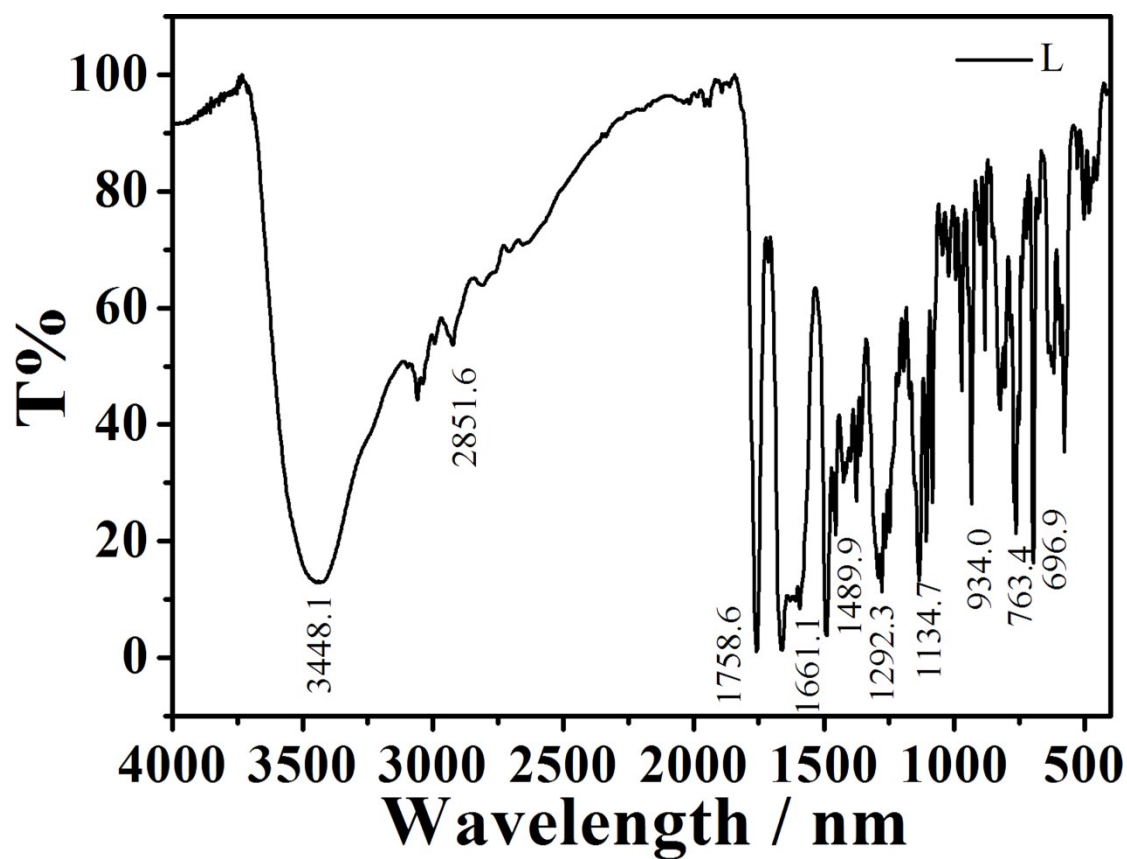

Fig. S3. FT-IR spectra of compound L

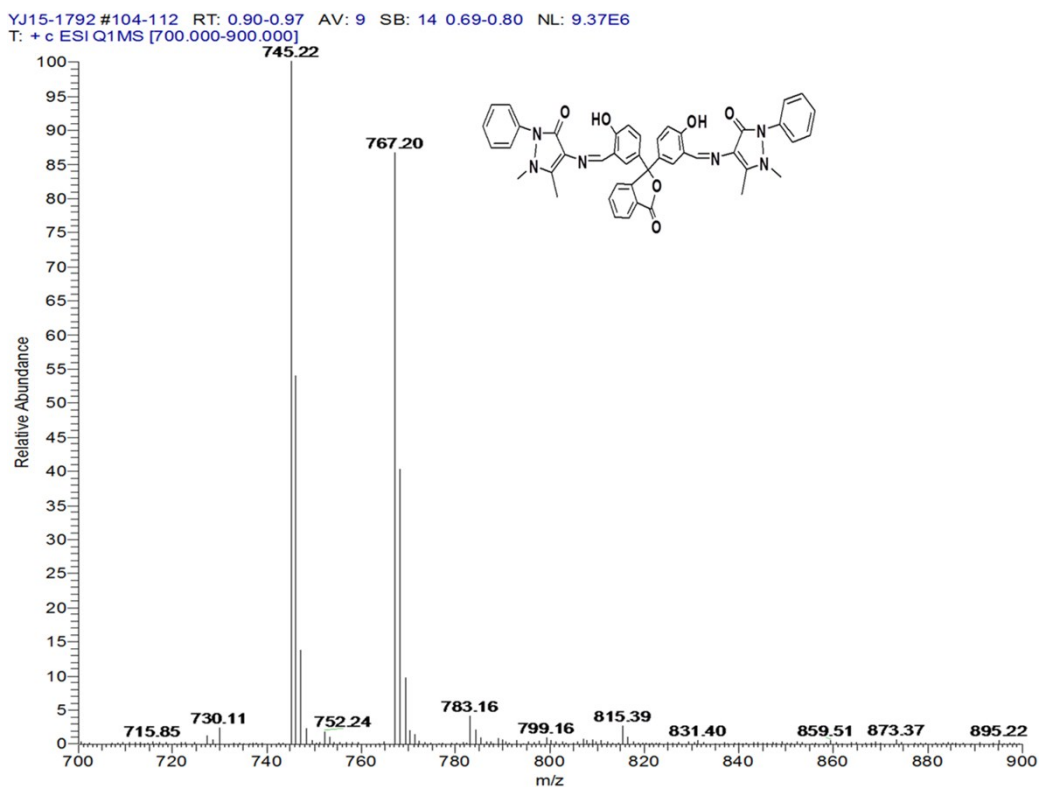

Fig. S4. ESI-MS spectrum of compound L

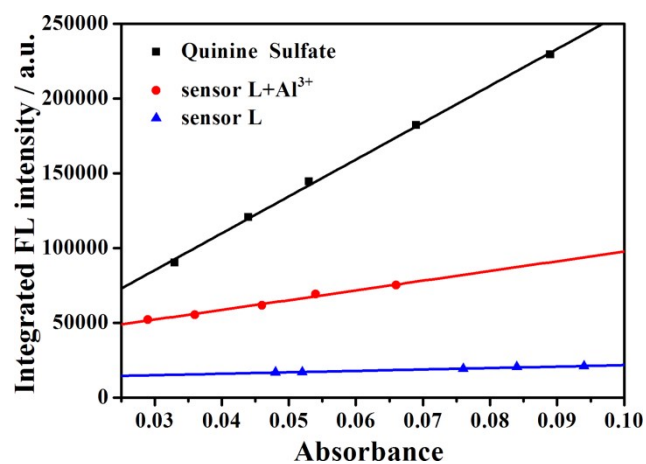

Fig. S5. Plots and fitting line of integrated fluorescence intensity (excited at 350 nm) against absorbance values at 350 nm of sulfate quinine (square dots, black), sensor L with Al<sup>3+</sup> (round dots, red), free sensor L (upper triangle dots, blue).

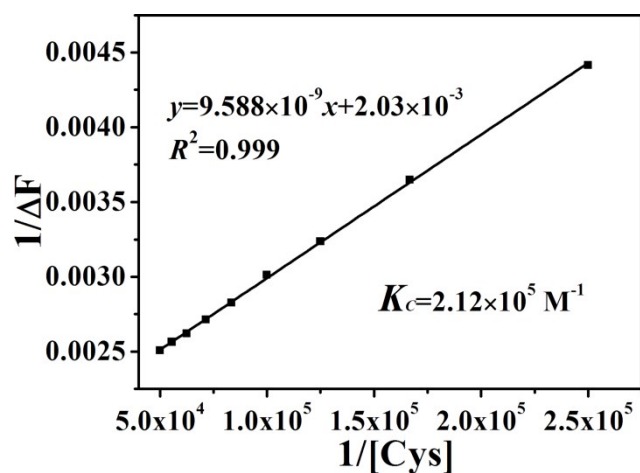

Fig. S6. Benesi-Hildebrand analysis of L-Cu(II) at different Cys concentrations.

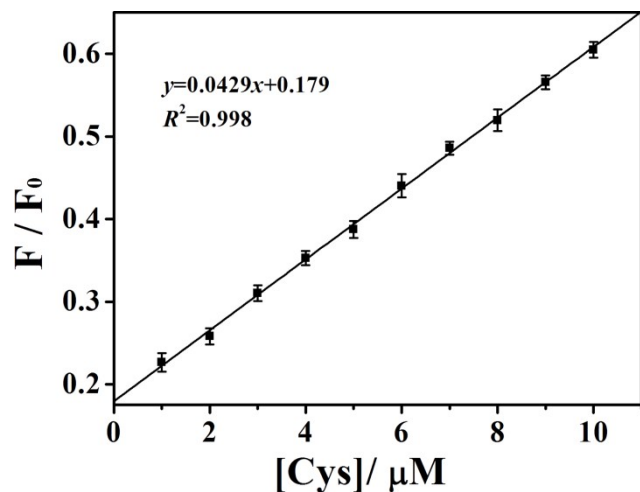

Fig. S7. Correlation of the fluorescence ratio ( $F/F_0$ ) with different additions of Cys standards to the solution of L-Cu(II) with blood serum.

Table S1. Comparison of our probe with other Schiff base chemosensors for  $Al^{3+}$  detection.

| Sensor     | Probe type | Binding constant          | Linear range  | LOD                     | Interference            | Ref.      |
|------------|------------|---------------------------|---------------|-------------------------|-------------------------|-----------|
| PMBA       | Turn on    | $4.63 \times 10^6 M^{-1}$ | 0–30 $\mu M$  | $2 \times 10^{-6} M$    | $Cu^{2+}$ and $Zn^{2+}$ | [1]       |
| 1-H        | Turn on    | $3.5 \times 10^4 M^{-1}$  | —             | $6.03 \times 10^{-7} M$ | —                       | [2]       |
| Sensor 1   | Turn on    | $\log \beta = 8.012$      | —             | $1 \times 10^{-7} M$    | $Cu^{2+}$ and $Fe^{3+}$ | [3]       |
| HANQ       | Turn on    | —                         | 0–1.5 $\mu M$ | $4 \times 10^{-8} M$    | —                       | [4]       |
| CQH        | Turn on    | $3.3 \times 10^6$         | 0–15 $\mu M$  | $8.2 \times 10^{-7} M$  | $Zn^{2+}$               | [5]       |
| HNN        | Turn on    | $5.08 \times 10^4 M^{-1}$ | —             | $2.94 \times 10^{-9} M$ | $Fe^{3+}$               | [6]       |
| Receptor 1 | Turn on    | $3.5 \times 10^3 M^{-1}$  | —             | $1 \times 10^{-5} M$    | $Cu^{2+}$               | [7]       |
| Receptor L | Turn on    | $2.63 \times 10^4 M^{-1}$ | 0–50 $\mu M$  | $1.5 \times 10^{-8} M$  | $Cu^{2+}$               | This work |

Table S2. Comparison of our probe with other organic chemosensors for sequential detection of Cys.

| Sensor           | Method                  | Binding constant          | Linear range    | Detection Limit ( $\mu M$ ) | Interference | Analyte       | Ref.      |
|------------------|-------------------------|---------------------------|-----------------|-----------------------------|--------------|---------------|-----------|
| Receptor 1       | Fluorescence            | —                         | 2–8 $\mu M$     | 0.17                        | —            | Cys, Hcy      | [8]       |
| BINOL            | Fluorescence            | $1.52 \times 10^3 M^{-1}$ | —               | —                           | Arg, Lys     | Cys, Hcy, GSH | [9]       |
| $Cu^{2+}$ -morin | Fluorescence            | —                         | 0.65–22 $\mu M$ | 0.065                       | —            | Cys           | [10]      |
| Calcein          | Fluorescence            | —                         | 0.3–12 $\mu M$  | 0.04                        | GSH          | Cys           | [11]      |
| Sensor 1         | UV-vis                  | $9.1 \times 10^4 M^{-1}$  | —               | 10.77                       | —            | Cys           | [12]      |
| Compound 1       | Fluorescence            | —                         | 0–20 $\mu M$    | 9.0                         | Hcy and GSH  | Cys           | [13]      |
| Compound 2       | Fluorescence            | $3.4 \times 10^4 M^{-1}$  | 0–30 $\mu M$    | 6.0                         | GSH          | Cys           | [14]      |
| Probe 1          | Fluorescence and UV-vis | —                         | 0–25 $\mu M$    | 0.18                        | —            | Cys           | [15]      |
| L                | Fluorescence and UV-vis | $2.12 \times 10^5 M^{-1}$ | 0–20 $\mu M$    | 0.00036                     | GSH          | Cys           | This work |

## References

- [1]. J. Q. Wang, L. Huang, L. Gao, J. H. Zhu, Y. Wang, X. Fan and Z. Zou, *Inorg. Chem. Commun.*, 2008, **11**, 203-206.
- [2]. S. Sen, T. Mukherjee, B. Chattopadhyay, A. Moirangthem, A. Basu, J. Marek and P. Chattopadhyay, *Analyst*, 2012, **137**, 3975-3981.
- [3]. X. H. Jiang, B.-d. Wang, Z. Y. Yang, Y. C. Liu, T.-r. Li and Z. C. Liu, *Inorg. Chem. Commun.*, 2011, **14**, 1224-1227.
- [4]. Y. Wang, L. Xiong, F. Geng, F. Zhang and M. Xu, *Analyst*, 2011, **136**, 4809-4814.
- [5]. J. C. Qin, T. R. Li, B. D. Wang, Z. Y. Yang and L. Fan, *Spectrochim. Acta, Part A*, 2014, **133**, 38-43.
- [6]. X.B. Li, J. Y. Chen and E. J. Wang, *Aust. J. Chem.*, 2015, **68**, 156-160.
- [7]. Y. K. Jang, U. C. Nam, H. L. Kwon, I. H. Hwang and C. Kim, *Dyes Pigm.*, 2013, **99**, 6-13.
- [8]. Q. Li, Y. Guo and S. Shao, *Sens. Actuators, B*, 2012, **171**, 872-877.
- [9]. R. Peng, L. Lin, X. Wu, X. Liu and X. Feng, *J. Org. Chem.*, 2013, **78**, 11602-11605.
- [10]. W. S. Liao, F. Y. Wu, Y. M. Wu and X. J. Wang, *Microchim. Acta*, 2008, **162**, 147-152.
- [11]. L. Chang, T. Wu and F. Chen, *Microchim. Acta*, 2012, **177**, 295-300.
- [12]. S. A. Lee, J. J. Lee, J. W. Shin, K. S. Min and C. Kim, *Dyes Pigm.*, 2015, **116**, 131-138.
- [13]. H. Wang, G. Zhou and X. Chen, *Sens. Actuators, B*, 2013, **176**, 698-703.
- [14]. O. G. Tsay, K. M. Lee and D. G. Churchill, *New J. Chem.*, 2012, **36**, 1949-1952.
- [15]. S. Xue, S. Ding, Q. Zhai, H. Zhang and G. Feng, *Biosens. Bioelectron.*, 2015, **68**, 316-321.
